# Supplementary material for: Physiological and immunological responses of sea cucumber Apostichopus japonicus during desiccation and subsequent resubmersion
Source: PeerJ. 2019 Aug 2;7:e7427. doi: 10.7717/peerj.7427 (PMC6681796; doi:10.7717/peerj.7427)
Supplement: Supplemental Information 1 [file peerj-07-7427-s001.xlsx]

## Sheet: Sheet1
TAD (h)	Control gourp (%)	Desiccation group (%)
0	100	100
0	100	100
0	100	100
1	100	96.6667
1	100	96.6667
1	100	100
3	100	90
3	100	86.6667
3	100	93.3333
6	100	73.3333
6	100	66.6667
6	100	80
12	100	66.6667
12	100	56.6667
12	100	60
18	100	50
18	100	43.3333
18	100	46.6667
30	100	20
30	100	10
30	100	16.6667
