# Supplementary material for: Physiological and immunological responses of sea cucumber Apostichopus japonicus during desiccation and subsequent resubmersion
Source: PeerJ. 2019 Aug 2;7:e7427. doi: 10.7717/peerj.7427 (PMC6681796; doi:10.7717/peerj.7427)
Supplement: Supplemental Information 2 [file peerj-07-7427-s002.xlsx]

## Sheet: Sheet1
Time type	Time	Physiological stress levels
		Glucose (mmol L-1)	Lactate (mmol L-1)	Cortisol (mmol L-1)	Osmolality (mOsm kg-1)
TAD	0	0.72	0.08	4.01	603.22
TAD	0	0.76	0.1	4.21	583.3
TAD	0	0.75	0.08	4.12	608.71
TAD	1	0.63	0.13	4.56	603.45
TAD	1	0.56	0.16	4.87	627.23
TAD	1	0.56	0.16	4.76	619.32
TAD	3	0.52	0.16	4.7	622.08
TAD	3	0.51	0.2	5.22	638.42
TAD	3	0.47	0.21	5.1	620.11
TAD	6	0.33	0.23	6.34	630.54
TAD	6	0.42	0.26	6.21	649.33
TAD	6	0.39	0.27	5.88	645.16
TARS1	3	0.62	0.14	4.72	617.84
TARS1	3	0.64	0.17	4.69	610.04
TARS1	3	0.66	0.17	4.88	605.45
TARS1	6	0.67	0.14	4.5	598.33
TARS1	6	0.6	0.12	4.62	619.91
TARS1	6	0.58	0.12	4.56	618.61
TARS1	12	0.7	0.14	4.6	586.45
TARS1	12	0.7	0.1	4.43	610.66
TARS1	12	0.71	0.09	4.45	608.92
TARS1	24	0.68	0.09	4.38	607.34
TARS1	24	0.73	0.1	4.48	593.39
TARS1	24	0.73	0.08	4.46	610.51
TARS3	3	0.53	0.2	4.89	611.34
TARS3	3	0.44	0.17	4.93	610.76
TARS3	3	0.47	0.17	4.71	622.98
TARS3	6	0.55	0.18	4.67	609.91
TARS3	6	0.56	0.16	4.92	604.76
TARS3	6	0.59	0.15	4.94	613
TARS3	12	0.57	0.16	4.73	584.34
TARS3	12	0.62	0.14	4.56	603.29
TARS3	12	0.63	0.14	4.5	604.13
TARS3	24	0.68	0.09	4.68	594.08
TARS3	24	0.65	0.13	4.69	608.63
TARS3	24	0.66	0.14	4.47	603.28
TARS6	3	0.3	0.18	6.4	630.12
TARS6	3	0.36	0.24	6.52	646.03
TARS6	3	0.37	0.26	6.61	637.55
TARS6	6	0.39	0.21	6.01	636.94
TARS6	6	0.42	0.18	6.33	621.58
TARS6	6	0.44	0.18	6.34	632.83
TARS6	12	0.48	0.17	5.92	623.82
TARS6	12	0.55	0.2	6.24	619.56
TARS6	12	0.54	0.2	6.14	628.53
TARS6	24	0.57	0.15	6.07	610.45
TARS6	24	0.64	0.17	5.88	623.54
TARS6	24	0.58	0.18	6.01	625.87
