# Supplementary material for: Physiological and immunological responses of sea cucumber Apostichopus japonicus during desiccation and subsequent resubmersion
Source: PeerJ. 2019 Aug 2;7:e7427. doi: 10.7717/peerj.7427 (PMC6681796; doi:10.7717/peerj.7427)
Supplement: Supplemental Information 4 [file peerj-07-7427-s004.xlsx]

## Sheet: Sheet1
Time type	Time	Antioxidant enzyme activities
		SOD (U mL-1)	CAT (U mL-1)
TAD	0	36.76	0.86
TAD	0	39.87	0.78
TAD	0	39.32	0.76
TAD	1	44.72	0.98
TAD	1	48.3	1.09
TAD	1	48.98	1.1
TAD	3	52.87	1.22
TAD	3	56.02	1.4
TAD	3	56.18	1.38
TAD	6	47.62	1.15
TAD	6	43.83	1.16
TAD	6	43.9	1.01
TARS1	3	46.93	1.03
TARS1	3	49.21	1.18
TARS1	3	46.87	1.15
TARS1	6	46.05	1.02
TARS1	6	44.53	1.04
TARS1	6	43.98	0.89
TARS1	12	41.87	0.87
TARS1	12	45.64	0.96
TARS1	12	46.64	0.98
TARS1	24	42.36	0.85
TARS1	24	39.99	0.87
TARS1	24	42.65	0.94
TARS3	3	53.43	1.18
TARS3	3	54.76	1.37
TARS3	3	51.08	1.36
TARS3	6	53.31	1.44
TARS3	6	55.87	1.21
TARS3	6	55.02	1.27
TARS3	12	47.54	1.18
TARS3	12	47.83	1.05
TARS3	12	44.29	1.15
TARS3	24	45.28	1.08
TARS3	24	43.82	0.97
TARS3	24	43.71	1.05
TARS6	3	42.85	1.2
TARS6	3	46.89	0.98
TARS6	3	46.11	1.17
TARS6	6	42.27	0.97
TARS6	6	44.68	1.13
TARS6	6	46.01	1.16
TARS6	12	42.47	0.95
TARS6	12	39.22	1.01
TARS6	12	38.67	0.89
TARS6	24	39.76	0.96
TARS6	24	41.9	0.94
TARS6	24	41.88	0.8
