# Supplementary material for: Physiological and immunological responses of sea cucumber Apostichopus japonicus during desiccation and subsequent resubmersion
Source: PeerJ. 2019 Aug 2;7:e7427. doi: 10.7717/peerj.7427 (PMC6681796; doi:10.7717/peerj.7427)
Supplement: Supplemental Information 5 [file peerj-07-7427-s005.xlsx]

## Sheet: Sheet1
Time type	Time	Non-specific immune reponse
		TCC (107 mL-1)	Phagocytosis (OD540 106 cells-1)	Complement C3 (μg mL-1)	T-NOS (U mL-1)	LSZ (U mL-1)	AKP (U 100 mL-1)
TAD	0	0.53	0.76	0.3	2.31	0.53	0.93
TAD	0	0.48	0.67	0.36	2.01	0.42	0.82
TAD	0	0.54	0.8	0.37	2.34	0.57	0.84
TAD	1	0.66	0.72	0.31	2.13	0.59	0.86
TAD	1	0.63	0.6	0.26	1.87	0.46	0.82
TAD	1	0.6	0.82	0.27	1.85	0.45	0.83
TAD	3	0.59	0.75	0.25	1.94	0.38	0.84
TAD	3	0.72	0.63	0.21	1.88	0.3	0.72
TAD	3	0.68	0.61	0.22	1.92	0.36	0.75
TAD	6	0.88	0.63	0.23	1.72	0.42	0.62
TAD	6	0.83	0.7	0.24	1.69	0.31	0.54
TAD	6	0.92	0.56	0.21	1.8	0.35	0.62
TARS1	3	0.59	0.81	0.28	2.01	0.48	0.76
TARS1	3	0.67	0.64	0.26	1.89	0.44	0.83
TARS1	3	0.69	0.62	0.29	1.95	0.52	0.82
TARS1	6	0.62	0.65	0.31	2.02	0.57	0.83
TARS1	6	0.57	0.73	0.22	2.1	0.58	0.89
TARS1	6	0.56	0.76	0.27	2.03	0.47	0.78
TARS1	12	0.55	0.75	0.3	1.99	0.49	0.88
TARS1	12	0.5	0.68	0.31	2.04	0.43	0.8
TARS1	12	0.49	0.8	0.33	1.9	0.55	0.82
TARS1	24	0.46	0.79	0.32	2	0.52	0.82
TARS1	24	0.52	0.8	0.35	2.2	0.55	0.78
TARS1	24	0.52	0.72	0.29	2.11	0.46	0.84
TARS3	3	0.66	0.58	0.23	1.83	0.41	0.75
TARS3	3	0.6	0.72	0.19	1.99	0.43	0.79
TARS3	3	0.65	0.67	0.2	1.96	0.37	0.78
TARS3	6	0.59	0.7	0.22	1.88	0.47	0.83
TARS3	6	0.64	0.56	0.25	1.81	0.38	0.82
TARS3	6	0.64	0.61	0.26	1.95	0.4	0.77
TARS3	12	0.55	0.71	0.25	1.97	0.42	0.86
TARS3	12	0.54	0.66	0.28	2.05	0.46	0.88
TARS3	12	0.48	0.74	0.26	1.93	0.46	0.84
TARS3	24	0.57	0.69	0.24	2	0.5	0.89
TARS3	24	0.48	0.6	0.31	2.14	0.51	0.86
TARS3	24	0.46	0.73	0.27	2.2	0.47	0.85
TARS6	3	0.86	0.65	0.22	1.81	0.34	0.5
TARS6	3	0.8	0.62	0.19	1.62	0.29	0.61
TARS6	3	0.87	0.58	0.18	1.67	0.37	0.57
TARS6	6	0.86	0.69	0.19	1.67	0.35	0.55
TARS6	6	0.92	0.55	0.22	1.62	0.36	0.58
TARS6	6	0.81	0.57	0.17	1.71	0.28	0.51
TARS6	12	0.82	0.72	0.2	1.81	0.39	0.72
TARS6	12	0.76	0.56	0.24	1.89	0.44	0.63
TARS6	12	0.82	0.63	0.24	1.84	0.43	0.75
TARS6	24	0.77	0.7	0.23	1.86	0.45	0.73
TARS6	24	0.71	0.64	0.26	1.77	0.49	0.77
TARS6	24	0.72	0.77	0.25	1.83	0.5	0.64
